# Supplementary material for: Phenotypic profiling of the human genome reveals gene products involved in plasma membrane targeting of SRC kinases
Source: HighWire-hosted journal article supplement (doi:10.1101/gr.116087.110), 2011-07-27
Supplement: Ritzerfeld_FigS3.pdf [file Ritzerfeld_FigS3.pdf]

**Fig. S3:**

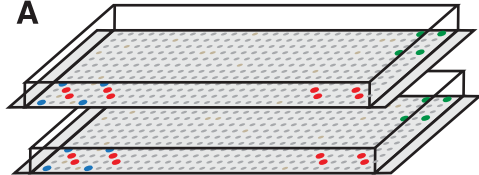

36h RNAi + 12h doxycycline  
on 384-spot siRNA arrays

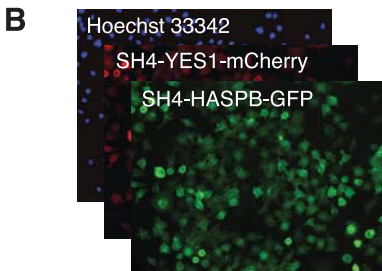

Automated Image Acquisition

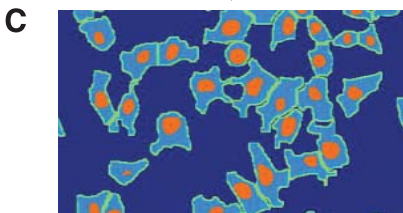

Automated Image Analysis

Hit criterion:  
score > 2.5 (SH4-HASPB-GFP)  
score > 3.5 (SH4-YES1-mCherry)

Data Analysis

Identification of 286 Potential Hits
