# Supplementary material for: Phenotypic profiling of the human genome reveals gene products involved in plasma membrane targeting of SRC kinases
Source: HighWire-hosted journal article supplement (doi:10.1101/gr.116087.110), 2011-07-27
Supplement: Supp_Legends.docx [file Supp_Legends.docx]

**Fig. S1: SH4-domain-containing fusion constructs and their doxycycline-dependent expression and plasma-membrane-localization in stably tranduced HeLa cells.** Fluorescent fusion proteins containing N-terminal SH4 domains were used to stably transduce HeLa cells. Expression was under the control of a doxycycline-dependent transactivator. **(A)** SH4-HASPB-GFP consisted of the N-terminal 18 amino acids of *Leishmania* Hydrophilic Acylated Surface Protein B (HASPB) fused to green fluorescent protein (GFP). SH4-YES1-mCherry consisted of the N-terminal 18 amino acids of the human orthologue of the SRC kinase YES1 fused to the red fluorescent protein mCherry. Both proteins are myristoylated at the N-terminal glycine residue (pink) and palmitoylated at a downstream cysteine residue (blue). **(B)** Stable HeLa cells were incubated in the presence of doxycycline to induce expression of both SH4-HASPB-GFP and SH4-YES1-mCherry and analyzed by flow cytometry. **(C)** Stable HeLa cells were treated with doxycycline to induce simultaneous expression of SH4-HASPB-GFP and SH4-YES1-mCherry and analyzed by live cell confocal microscopy to determine the subcellular localization of both fusion proteins.

**Fig. S2: Cell segmentation and classification using an automated image analysis tool. (A)** Individual cells were segmented into three different compartments: the plasma membrane, the cytoplasm and the nucleus. **(B)** Intensity features were extracted for the whole cell area as well as for each cellular compartment and used for cell classification according to the depicted decision tree.

**Fig. S3: Workflow of the primary RNAi screening procedure. (A)** HeLa cells were cultivated for 36 hours on 384-spot siRNA arrays containing positive (blue and green dots) and negative (red dots) controls to down-regulate target proteins. Afterwards, expression of SH4-HASPB-GFP and SH4-YES1-mCherry was induced by doxycycline. **(B)** 48 hours post-transfection, nuclei were labelled and images were acquired for the three available channels (Hoechst, Cherry, GFP) using an automated wide-field microscopy platform. **(C)** Images were analyzed using the image analysis tool described in the main text resulting in the calculation of scores for each experimental condition. Scores above 2.5 and 3.5 for SH4-HASPB-GFP and SH4-YES1-mCherry, respectively, were classified as hits and resulted in the identification of 286 potential hits during the primary screening procedure.

**Fig. S4: Phenotypic changes following siRNA-mediated down-regulation of control proteins.** HeLa cells were cultivated on siRNA arrays to down-regulate target proteins followed by the induction of expression of SH4-HASPB-GFP and SH4-YES1-mCherry, respectively. Cell nuclei were labelled and cells were subjected to automated live-cell fluorescence microscopy 48 hours post-transfection in areas containing spots with immobilized siRNAs as indicated by dashed circles. Images from all three channels are shown. (**A-C)** scrambled siRNA; **(D-F)** siRNA targeted against GFP; **(G-I)** siRNA targeting the inner centromere protein INCENP.

**Fig. S5:** **Quantification of cellular cholesterol levels and knockdown efficiencies at the mRNA and protein level. (A)** Cholesterol / PC ratios were determinedby nano-electrospray ionisation mass spectrometry as described previously ([Merz et al. 2011](#_ENREF_26)). Following treatment of cells with either a siRNA targeting MVD or treatment with methyl-β-cyclodextrin, lipid analysis was performed from both whole cells and cellular membranes (n≥3). **(B)** MVD mRNA levels were quantified by quantitative real-time PCR in HeLa cells expressing SH4-HASPB-GFP and SH4-YES1-mCherry. (n=3). **(C-E)** Total cell lysates from HeLa cells expressing SH4-HASPB-GFP and SH4-YES1-mCherry after transfection with the siRNAs indicated were analyzed by SDS-PAGE and Western blotting. **(C)** Quantification of MVD protein levels after knockdown of MVD. Data were normalized to the scrambled control. (n=4) **(D)** Quantification of PRKCA protein levels after knockdown of PRKCA. Data were normalized to the scrambled control. (n=3) (A representative Western blot is shown in figure 4.) **(E)** Quantification of protein levels of COPB1 and ARCN1 after knockdown with the respective siRNAs. Data were normalized to the scrambled control. (n=3) (A representative Western blot is shown in figure 5.)

**Fig. S6:** **Analysis of the influence of the fluorescent proteins fused to SH4-domains on the subcellular localization of SH4 fusion proteins and the role of other coatomer subunits on SH4-dependent protein transport.** **(A)** Stable HeLa cells expressing SH4-HASPB-mCherry (a-c) or SH4-YES1-GFP (d-f), respectively, were transfected with a scrambled siRNA (a,d) and siRNAs directed against COPB1 (b,e) and PRKCA (c,f) and subjected to live-cell confocal microscopy to determine the subcellular localization of SH4 fusion proteins. **(B)** Stable HeLa cells simultaneously expressing SH4-HASPB-GFP and SH4-YES1-mCherry were transfected with siRNAs directed against COPA (a-c) and COPB2 (d-f) and analyzed by live-cell fluorescence microscopy to determine the subcellular localization of both SH4 fusion proteins. (The respective control with a scrambled siRNA is shown in figure 5.)

**Table S1: Gene products targeted in the validation screen.**

**Table S2: Validated gene products with a putative function in SH4-domain-dependent intracellular trafficking.**
